# Supplementary material for: Synthesis of mesoporous Eu2O3microspheres and Eu2O3nanoparticle-wires as well as their optical properties
Source: Royal Society of Chemistry journal article supplement (doi:10.1039/c003981k), 2010-09-27
Supplement: c003981k.pdf [file c003981k.pdf]

**Electronic supplementary information for:**

**Synthesis of mesoporous  $\text{Eu}_2\text{O}_3$  microspheres and  $\text{Eu}_2\text{O}_3$   
nanoparticle-wires as well as their optical properties**

Yue Li,<sup>a</sup> Ming Ge,<sup>a</sup> Junwei Li,<sup>a</sup> Junfeng Wang,<sup>a\*</sup> and Haijun Zhang<sup>b\*</sup>

<sup>a</sup>Tianjin Key Laboratory of Environmental Remediation and Pollution Control,  
Nankai University, Tianjin 300071, P.R. China.

<sup>b</sup>School of Physics and Materials Science, Anhui University, Hefei Anhui 230039  
China.

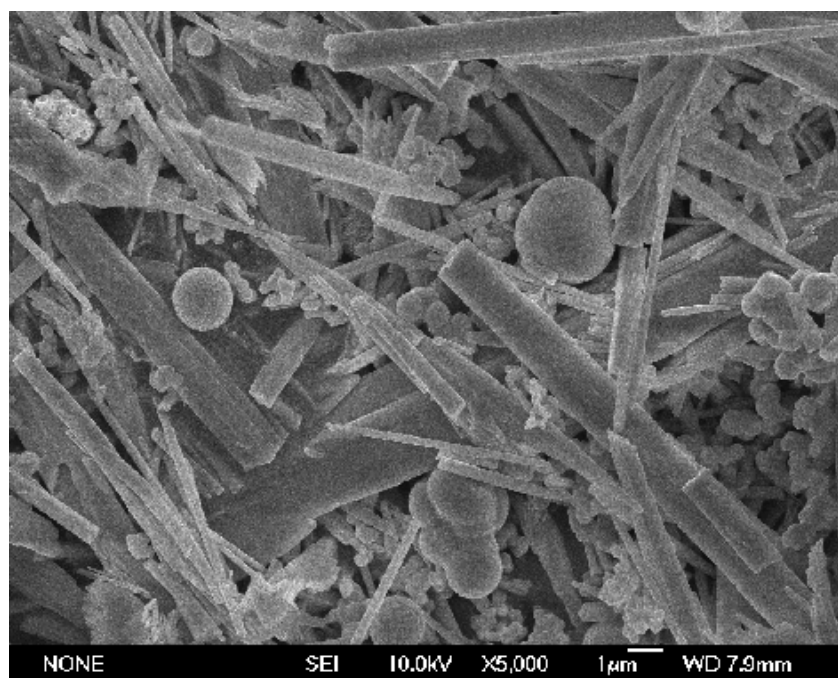

**Figure.S1** FESEM image of synthetic product not using SDS templates
